# Supplementary material for: Irreversible electron attachment – a key to DNA damage by solvated electrons in aqueous solution
Source: Royal Society of Chemistry journal article supplement (doi:10.1039/c5ob01542a), 2015-01-01
Supplement: c5ob01542a1.pdf [file c5ob01542a1.pdf]

## Electronic Supplementary Information

### Irreversible electron attachment - a key to DNA damage by solvated electrons in aqueous solution

K. Westphal,<sup>a,†</sup> J. Wiczak,<sup>a,†</sup> J. Miloch,<sup>a</sup> G. Kciuk,<sup>b</sup> K. Bobrowski<sup>b</sup> and J. Rak<sup>\*,a</sup>

<sup>a</sup>Faculty of Chemistry, University of Gdańsk, Wita Stwosza 63, 80-308 Gdańsk, Poland

<sup>b</sup>Centre of Radiation Research and Technology, Institute of Nuclear Chemistry and Technology, Dorodna 16, 03-195  
Warsaw, Poland

† these authors contributed equally

\* e-mail: janusz.rak@ug.edu.pl

#### Table of contents

|                |    |
|----------------|----|
| Scheme S1..... | S2 |
| Table S1.....  | S3 |
| Table S2.....  | S4 |
| Table S3.....  | S5 |
| Table S4.....  | S6 |
| Figure S1..... | S7 |
| Figure S2..... | S8 |
| Figure S3..... | S9 |



**Scheme S1** Digestion of a TXT trimer by Micrococcal (MC) or P1 nuclease (P1).

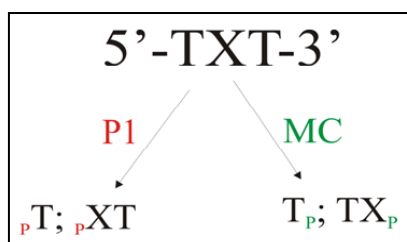

**Table S1** Retention times (for HPLC conditions see the *Chromatography* section) for dimers (pXT/TXp) and monomers (pT/Tp) obtained by enzymatic digestion with Micrococcal Nuclease (A) and P1 nuclease (B)

A

| Name | Retention time [min.]            |                                   |
|------|----------------------------------|-----------------------------------|
|      | HO <sub>1</sub> T <sub>2</sub> P | HO <sub>1</sub> TX <sub>2</sub> P |
| TAT  | 7,3-9,3                          | 10,8-11,4                         |
| TCT  | -                                | 10,3-10,9                         |
| TTT  | 7,2-7,8                          | 11,7-12,3                         |
| TUT  | -                                | 11,4-12,1                         |
| TGT  | -                                | 9,4-10,0                          |

B

| Name | Retention time [min.] |                   |
|------|-----------------------|-------------------|
|      | pT <sub>OH</sub>      | pXT <sub>OH</sub> |
| TAT  | 5,0-5,8               | -                 |
| TCT  | 4,9-5,5               | -                 |
| TTT  | 5,1-5,8               | -                 |
| TUT  | 5,1-5,8               | 9,8-11,2          |
| TGT  | -                     | -                 |

**Table S2** Stable fragments obtained after gamma irradiation of modified trimmers in 30 mM Tris

|              | dT=O | HO <sub>2</sub> T <sub>OH</sub> | pT <sub>OH</sub> | HO <sub>2</sub> T <sub>P</sub> | HO <sub>2</sub> TX=O | HO <sub>2</sub> TX <sub>P</sub> | HO <sub>2</sub> XT <sub>OH</sub> /<br>HO <sub>2</sub> TX <sub>OH</sub> | pXT <sub>OH</sub> | T <sub>HO</sub> XT | T <sub>OXO</sub> XT | abasic<br>site | TXT | TYT |
|--------------|------|---------------------------------|------------------|--------------------------------|----------------------|---------------------------------|------------------------------------------------------------------------|-------------------|--------------------|---------------------|----------------|-----|-----|
| <b>TBrUT</b> | +    | +                               | +                | +                              | +                    | +                               | +                                                                      | +                 | +                  | -                   | +              | +   | +   |
| <b>TBrCT</b> | +    | +                               | +                | +                              | +                    | +                               | +                                                                      | +                 | +                  | -                   | +              | +   | +   |
| <b>TBrAT</b> | -    | +                               | +                | +                              | -                    | +                               | +                                                                      | +                 | -                  | -                   | -              | +   | +   |
| <b>TBrGT</b> | -    | +                               | +                | +                              | -                    | +                               | +                                                                      | +                 | -                  | +                   | -              | +   | +   |

**Table S3** Molar absorption coefficients<sup>1</sup>

| TYT          | TXT   | dihydro-TXT | pXT <sub>OH</sub> | HOXT <sub>OH</sub> /<br>HO <sub>TX</sub> OH | pT <sub>OH</sub> /<br>HO <sub>Tp</sub> | HO <sub>T</sub> OH | HO <sub>TX=O</sub> | dT=O | Abasic site | T <sub>HOXT</sub> | T <sub>OxoXT</sub> |
|--------------|-------|-------------|-------------------|---------------------------------------------|----------------------------------------|--------------------|--------------------|------|-------------|-------------------|--------------------|
| <b>TBrAT</b> |       |             |                   |                                             |                                        |                    |                    |      |             |                   |                    |
| 30200        | 30800 | 28400       | 22800             | 23400                                       | 8700                                   | 8700               | 23400              | 8700 | 16800       | n/a               | 26500              |
| <b>TBrCT</b> |       |             |                   |                                             |                                        |                    |                    |      |             |                   |                    |
| 19300        | 23600 | 21200       | 15200             | 16200                                       | 8700                                   | 8700               | 16200              | 8700 | 16800       | 19600             | n/a                |
| <b>TBrUT</b> |       |             |                   |                                             |                                        |                    |                    |      |             |                   |                    |
| 21300        | 26432 | 24032       | 18332             | 18332                                       | 8700                                   | 8700               | 18332              | 8700 | 16800       | 21100             | n/a                |
| <b>TBrGT</b> |       |             |                   |                                             |                                        |                    |                    |      |             |                   |                    |
| 27300        | 27500 | 25100       | 20000             | 19000                                       | 8700                                   | 8700               | 19000              | 8700 | 16800       | n/a               | 21900              |
| <b>TTT</b>   |       |             |                   |                                             |                                        |                    |                    |      |             |                   |                    |
| n/a          | 24800 | 22400       | n/a               | n/a                                         | n/a                                    | n/a                | n/a                | n/a  | n/a         | n/a               | n/a                |

<sup>1</sup>absorption coefficient,  $\epsilon_{TXT}$ , calculated using the nearest neighbor model (*Biophys. Chem.* **2008**, *133*, 66–70; <http://biophysics.idtdna.com/UVSpectrum.html>);

Absorption coefficient,  $\epsilon_Y$ , taken from <http://www.glenresearch.com/Technical/Extinctions.html>;

$$\begin{aligned} \epsilon_{TYT} &= \epsilon_{TXT} - \epsilon_X + \epsilon_Y; & \epsilon_{pXT_{OH}} &= \epsilon_{OH^{XT}_{OH}} = \epsilon_{XT}; & \epsilon_{OH^{Tp}} &= \epsilon_{pT_{OH}} = \epsilon_{OH^{T}_{OH}} = \epsilon_T; \\ \epsilon_{O=XT_{OH}} &= \epsilon_{TX}; & \epsilon_{dT=O} &= \epsilon_T; & \epsilon_{abasic\ site} &= \epsilon_{TXT} - \epsilon_X; & \epsilon_{T_{HOXT}} &= \epsilon_{TXT} - \epsilon_X + \epsilon_{HO^X}; \\ \epsilon_{T_{oxoXT}} &= \epsilon_{TXT} - \epsilon_X + \epsilon_{oxo^X}; & \epsilon_{dihydro-TXT} &= \epsilon_{TXT} - \epsilon_T + \epsilon_{dihydro-T} \end{aligned}$$

**Table S4** Molar contribution (in %) of individual products generated by irradiation of  $3 \times 10^{-5}$  M TBrAT solution containing various amount of Tris with 140 Gy (for individual molar absorption coefficients see Table S3 and for product symbols see Fig. 2).

| <b>Product</b>                             | <b>0<sup>a</sup></b> | <b>60<sup>a</sup></b> | <b>200<sup>a</sup></b> |
|--------------------------------------------|----------------------|-----------------------|------------------------|
| <b>pT<sub>OH</sub></b>                     | 1.19                 | 0.27                  | 0.19                   |
| <b>hOT<sub>OH</sub>/hOT<sub>P</sub></b>    | 1.65                 | 0.55                  | 0.52                   |
| <b>hOTA<sub>OH</sub>/hOTA<sub>OH</sub></b> | 8.75                 | 2.65                  | 2.52                   |
| <b>pAT<sub>OH</sub></b>                    | 7.67                 | 1.60                  | 1.49                   |
| <b>TOxoAT</b>                              | 1.03                 | -                     | -                      |
| <b>TAT</b>                                 | 29.83                | 11.94                 | 14.2                   |

<sup>a</sup> Tris concentration in mM

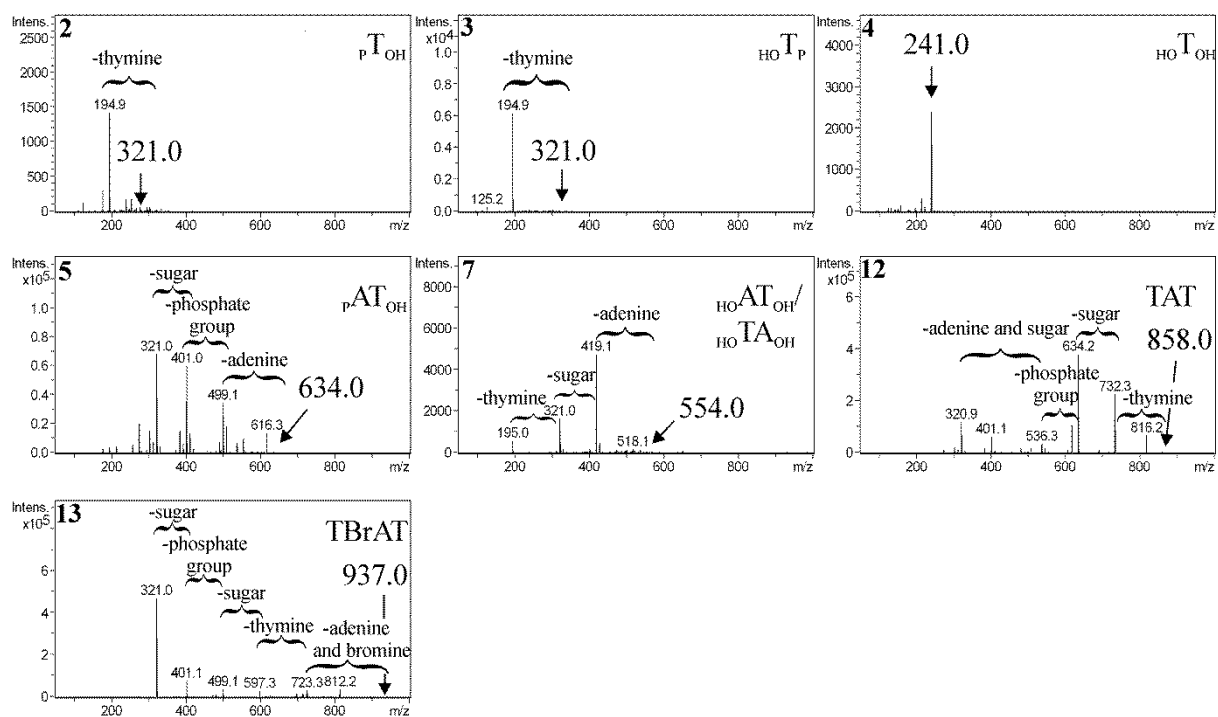

**Fig. S1** MS/MS (in the negative ionization mode) spectra of gamma irradiated aqueous solution of TBrAT (the arrows indicate the mass of pseudomolecular anions; for species symbols see Fig. 2).



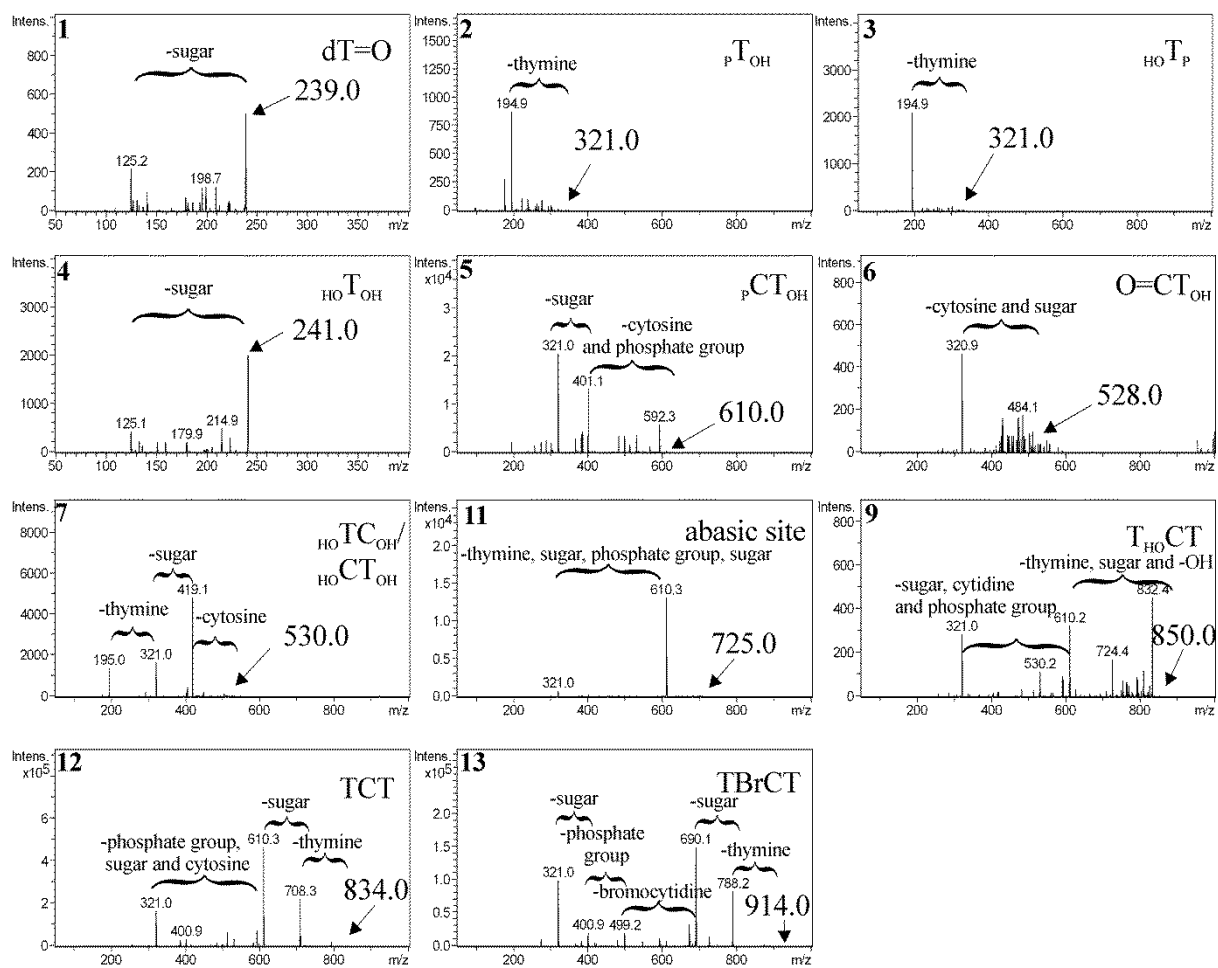

**Fig. S2** MS/MS (in the negative ionization mode) spectra of gamma irradiated aqueous solution of TBrCT (the arrows indicate the mass of pseudomolecular anions; for species symbols see Fig. 2).

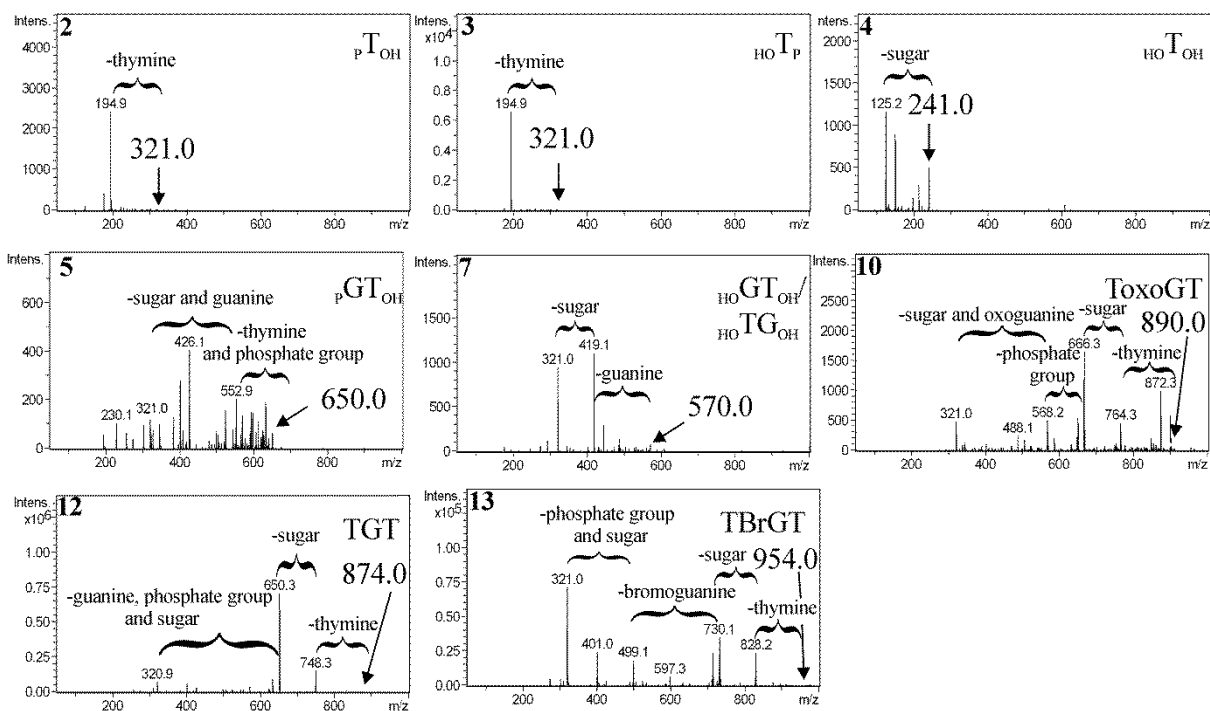

**Fig. S3** MS/MS (in the negative ionization mode) analysis of gamma irradiated aqueous solution of TBrGT (the arrows indicate the mass of pseudomolecular anions; for species symbols see Fig. 2).
